# Supplementary material for: Extensive expansion and diversification of the chemokine gene family in zebrafish: Identification of a novel chemokine subfamily CX
Source: PubMed Central journal article supplement (PMC2416438; doi:10.1186/1471-2164-9-222), 2008-05-15
Supplement: 1471-2164-9-222-S4.pdf [file 1471-2164-9-222-S4.pdf]

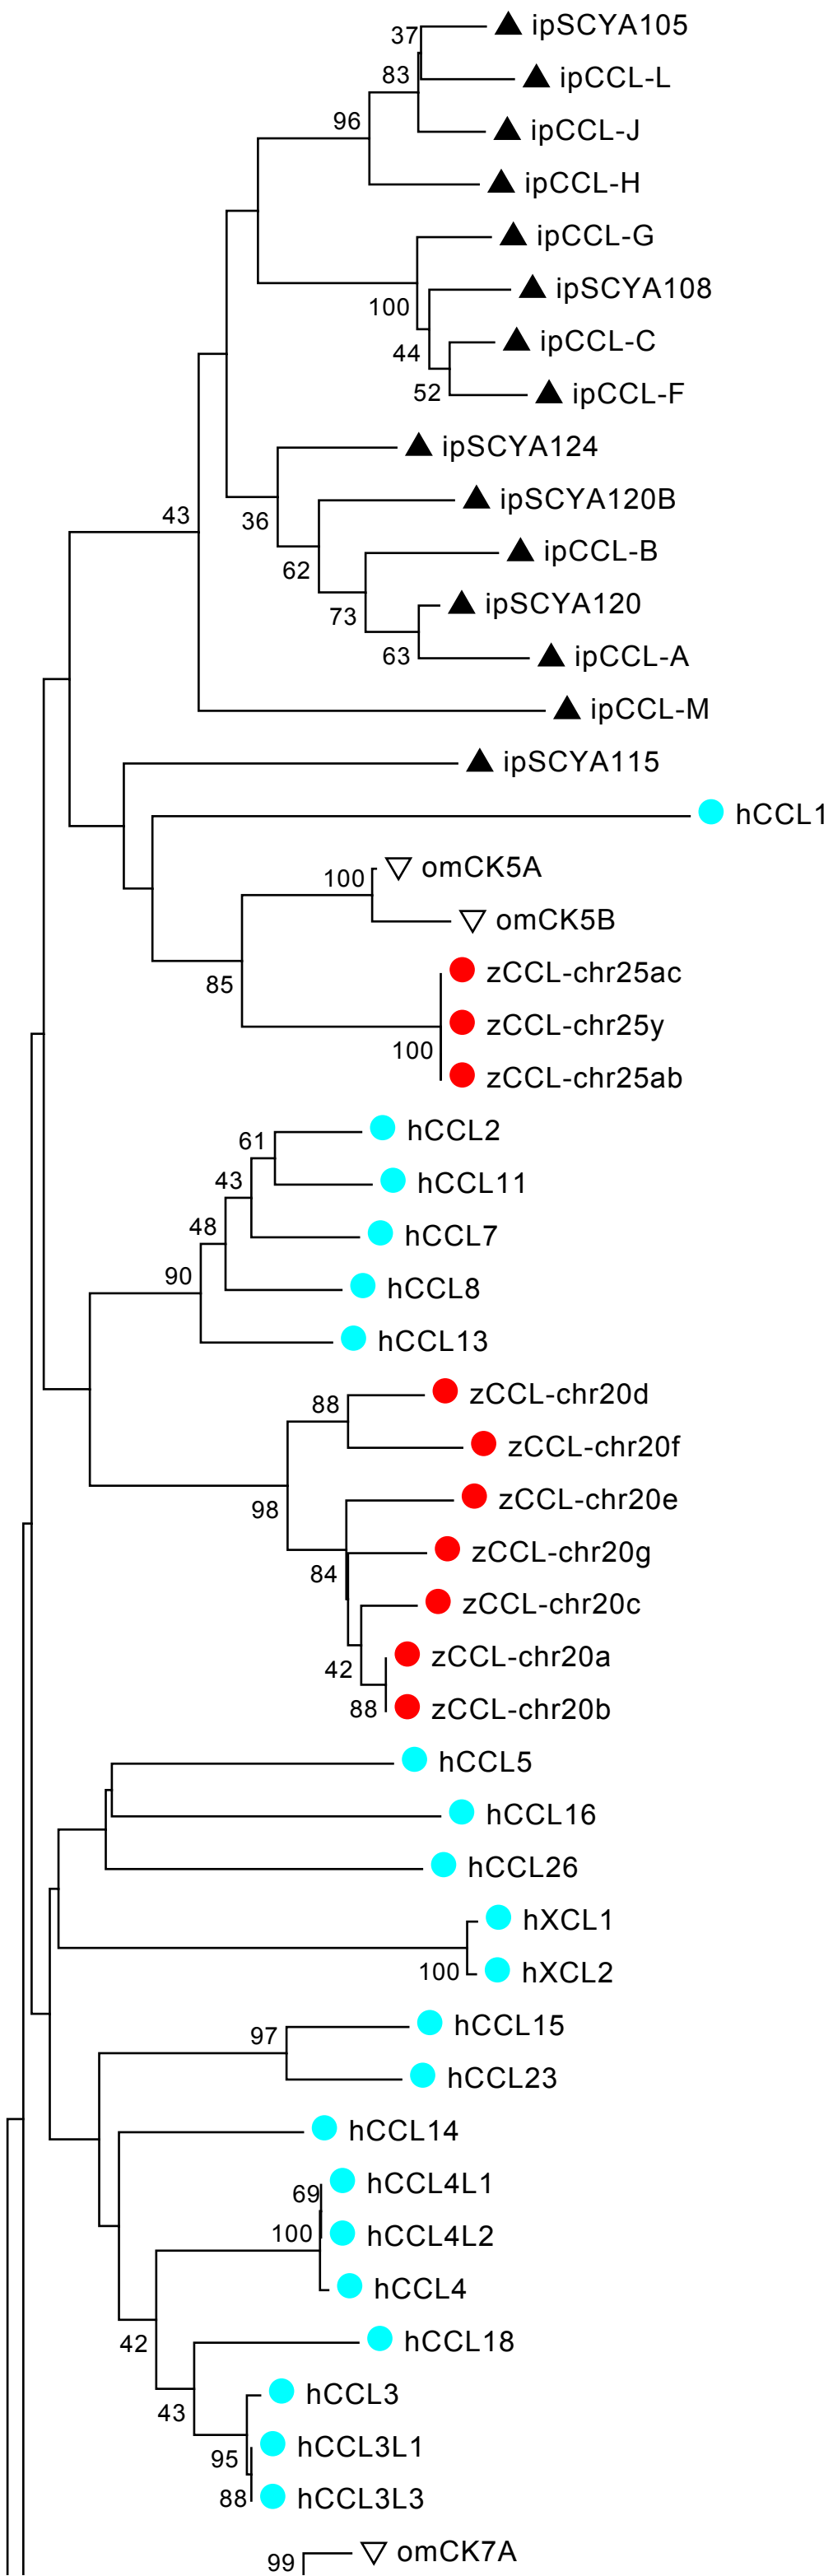

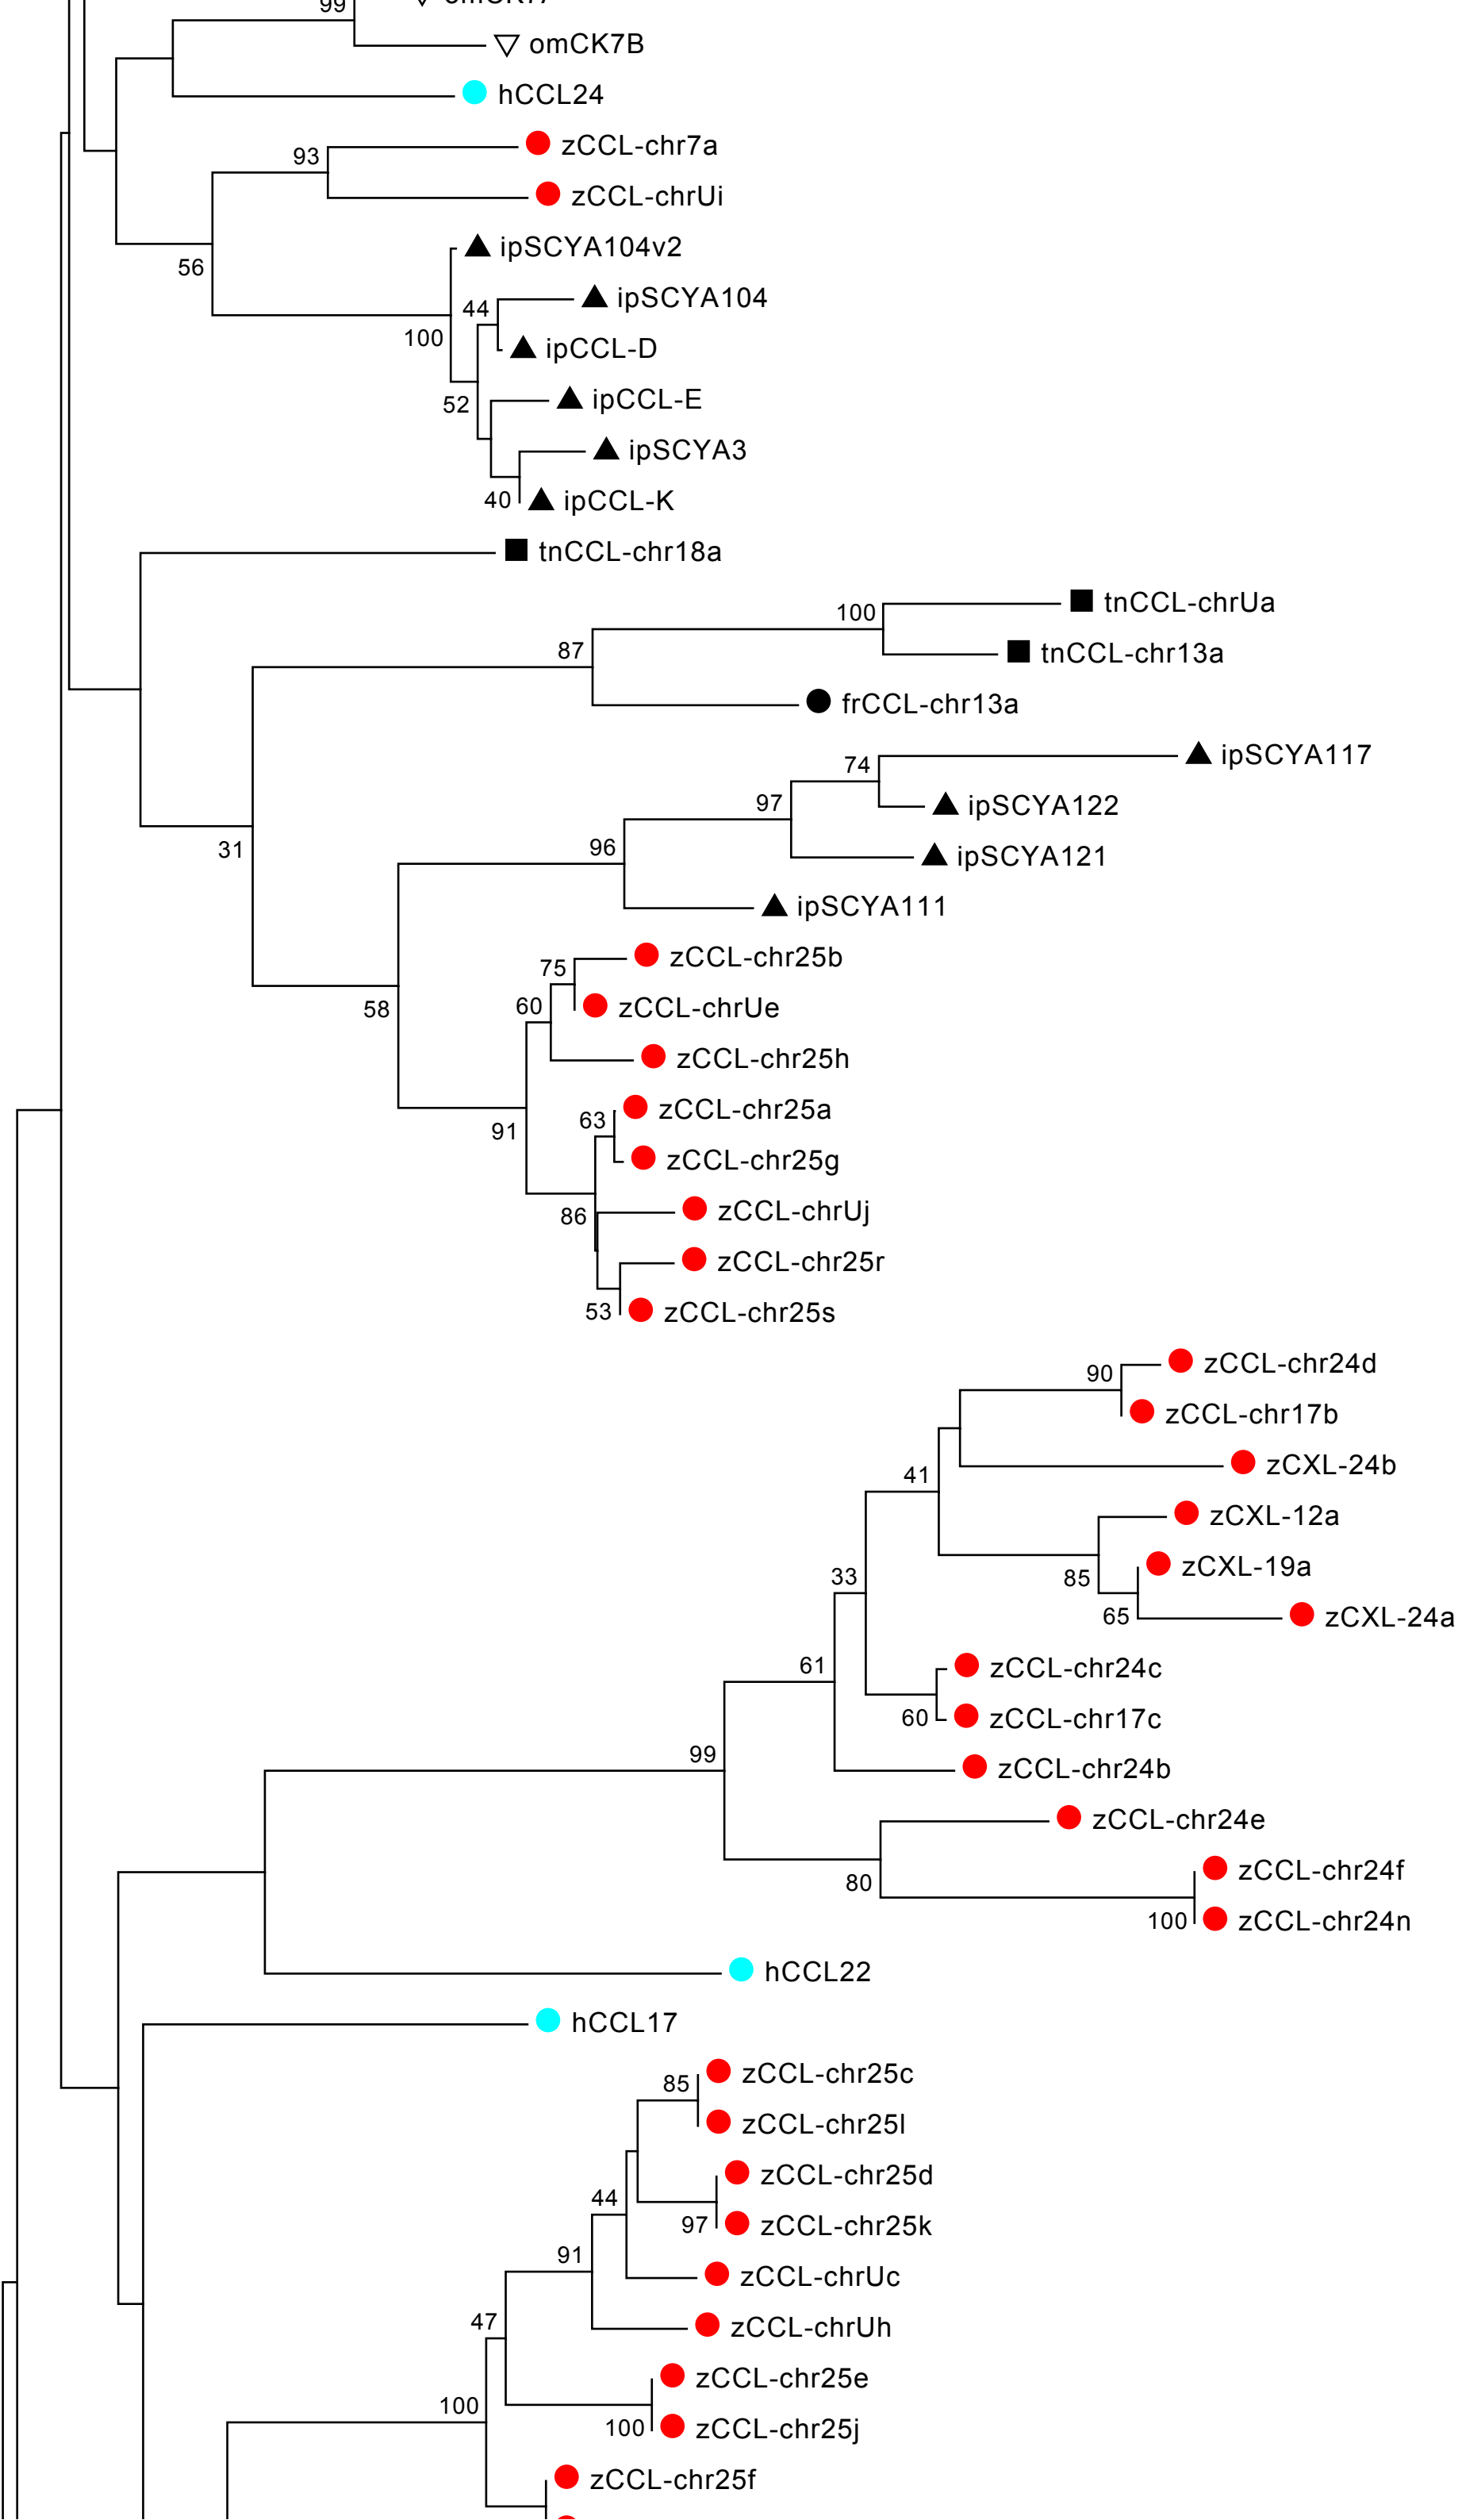

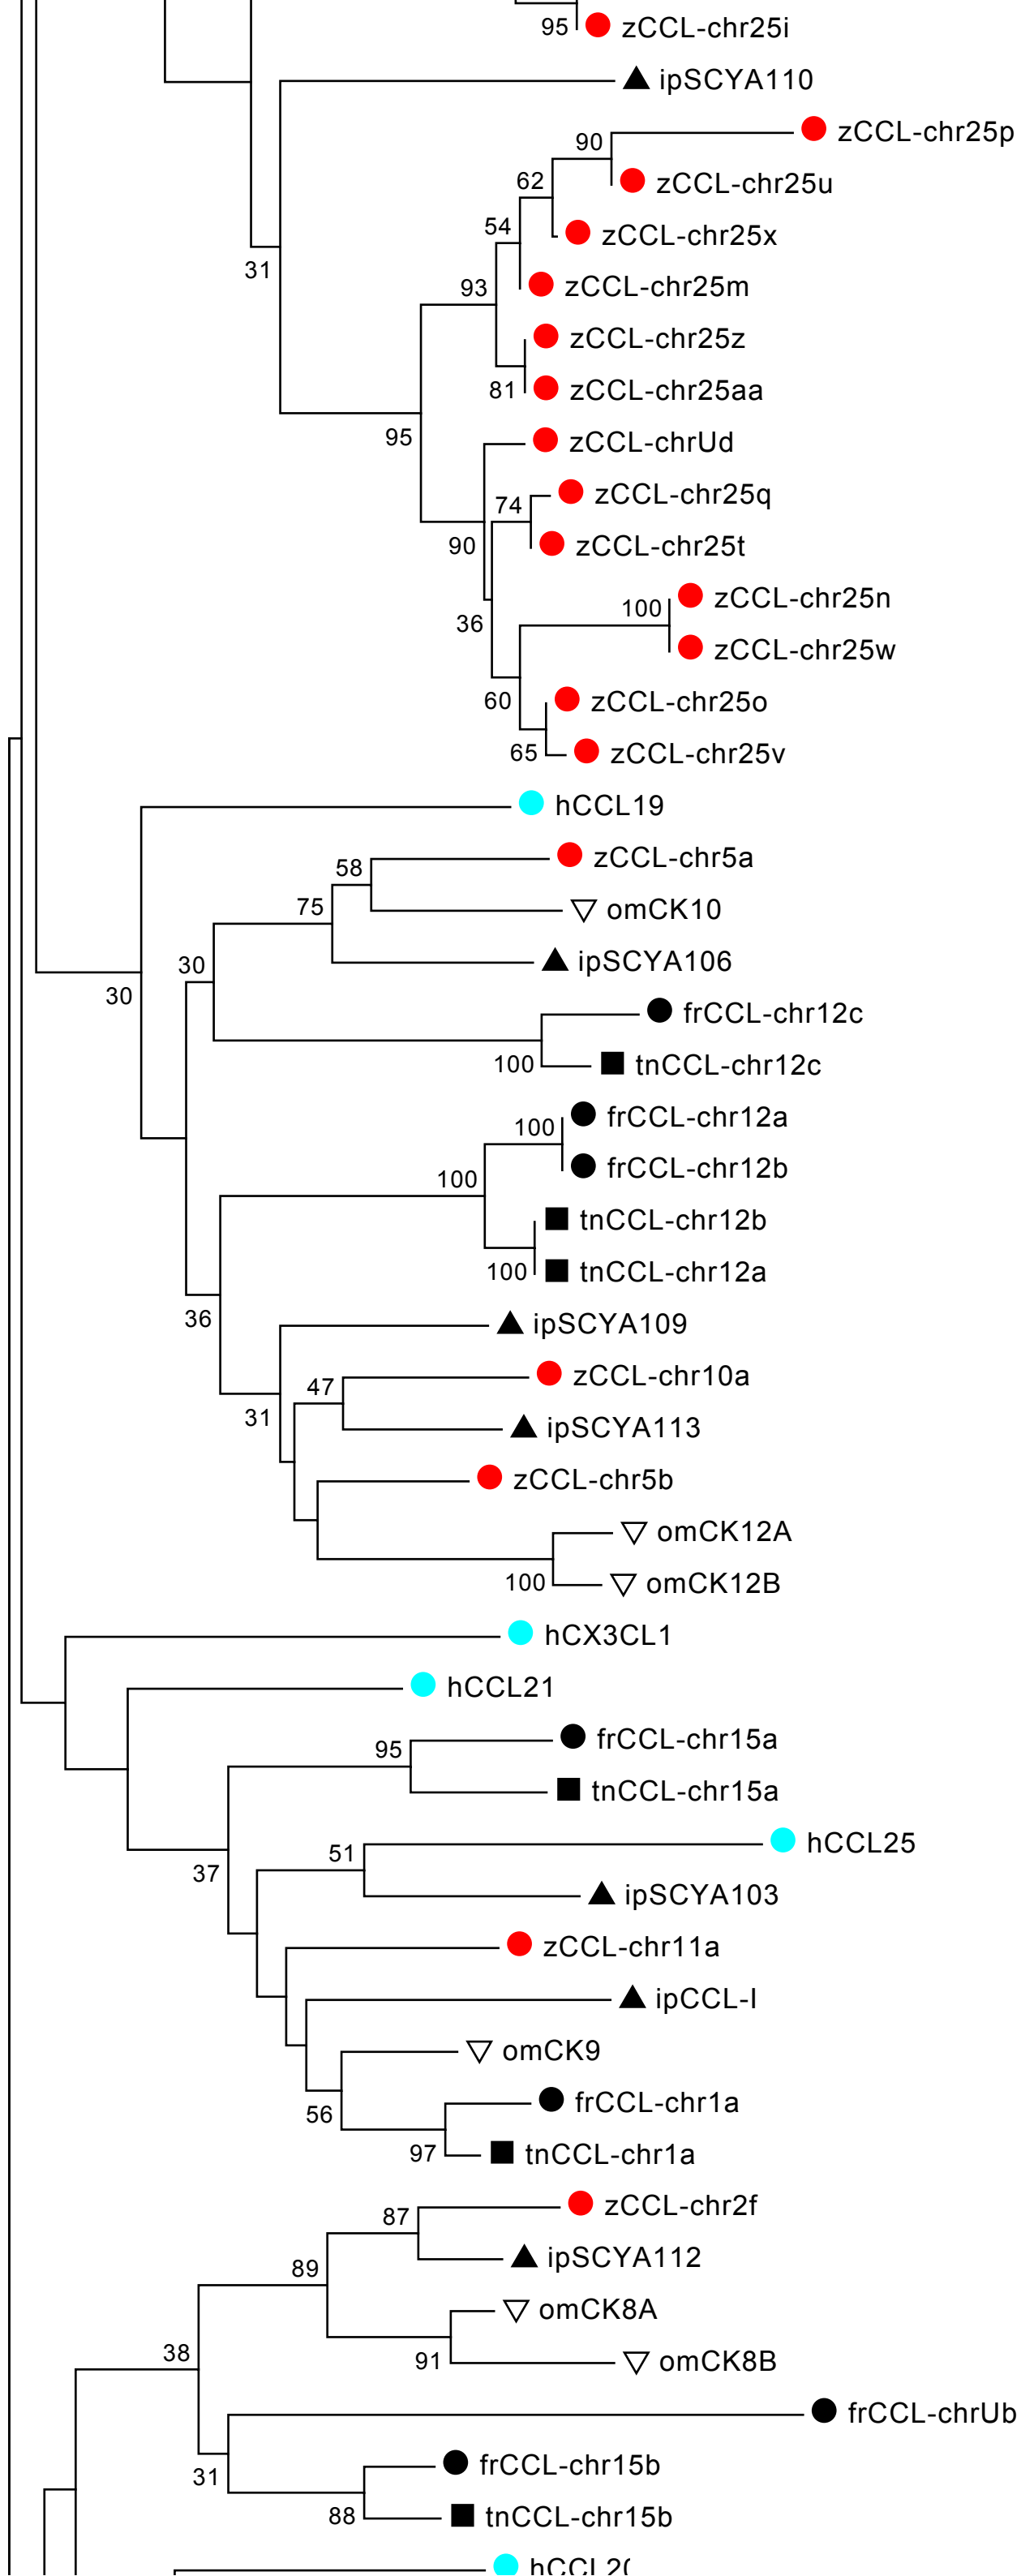

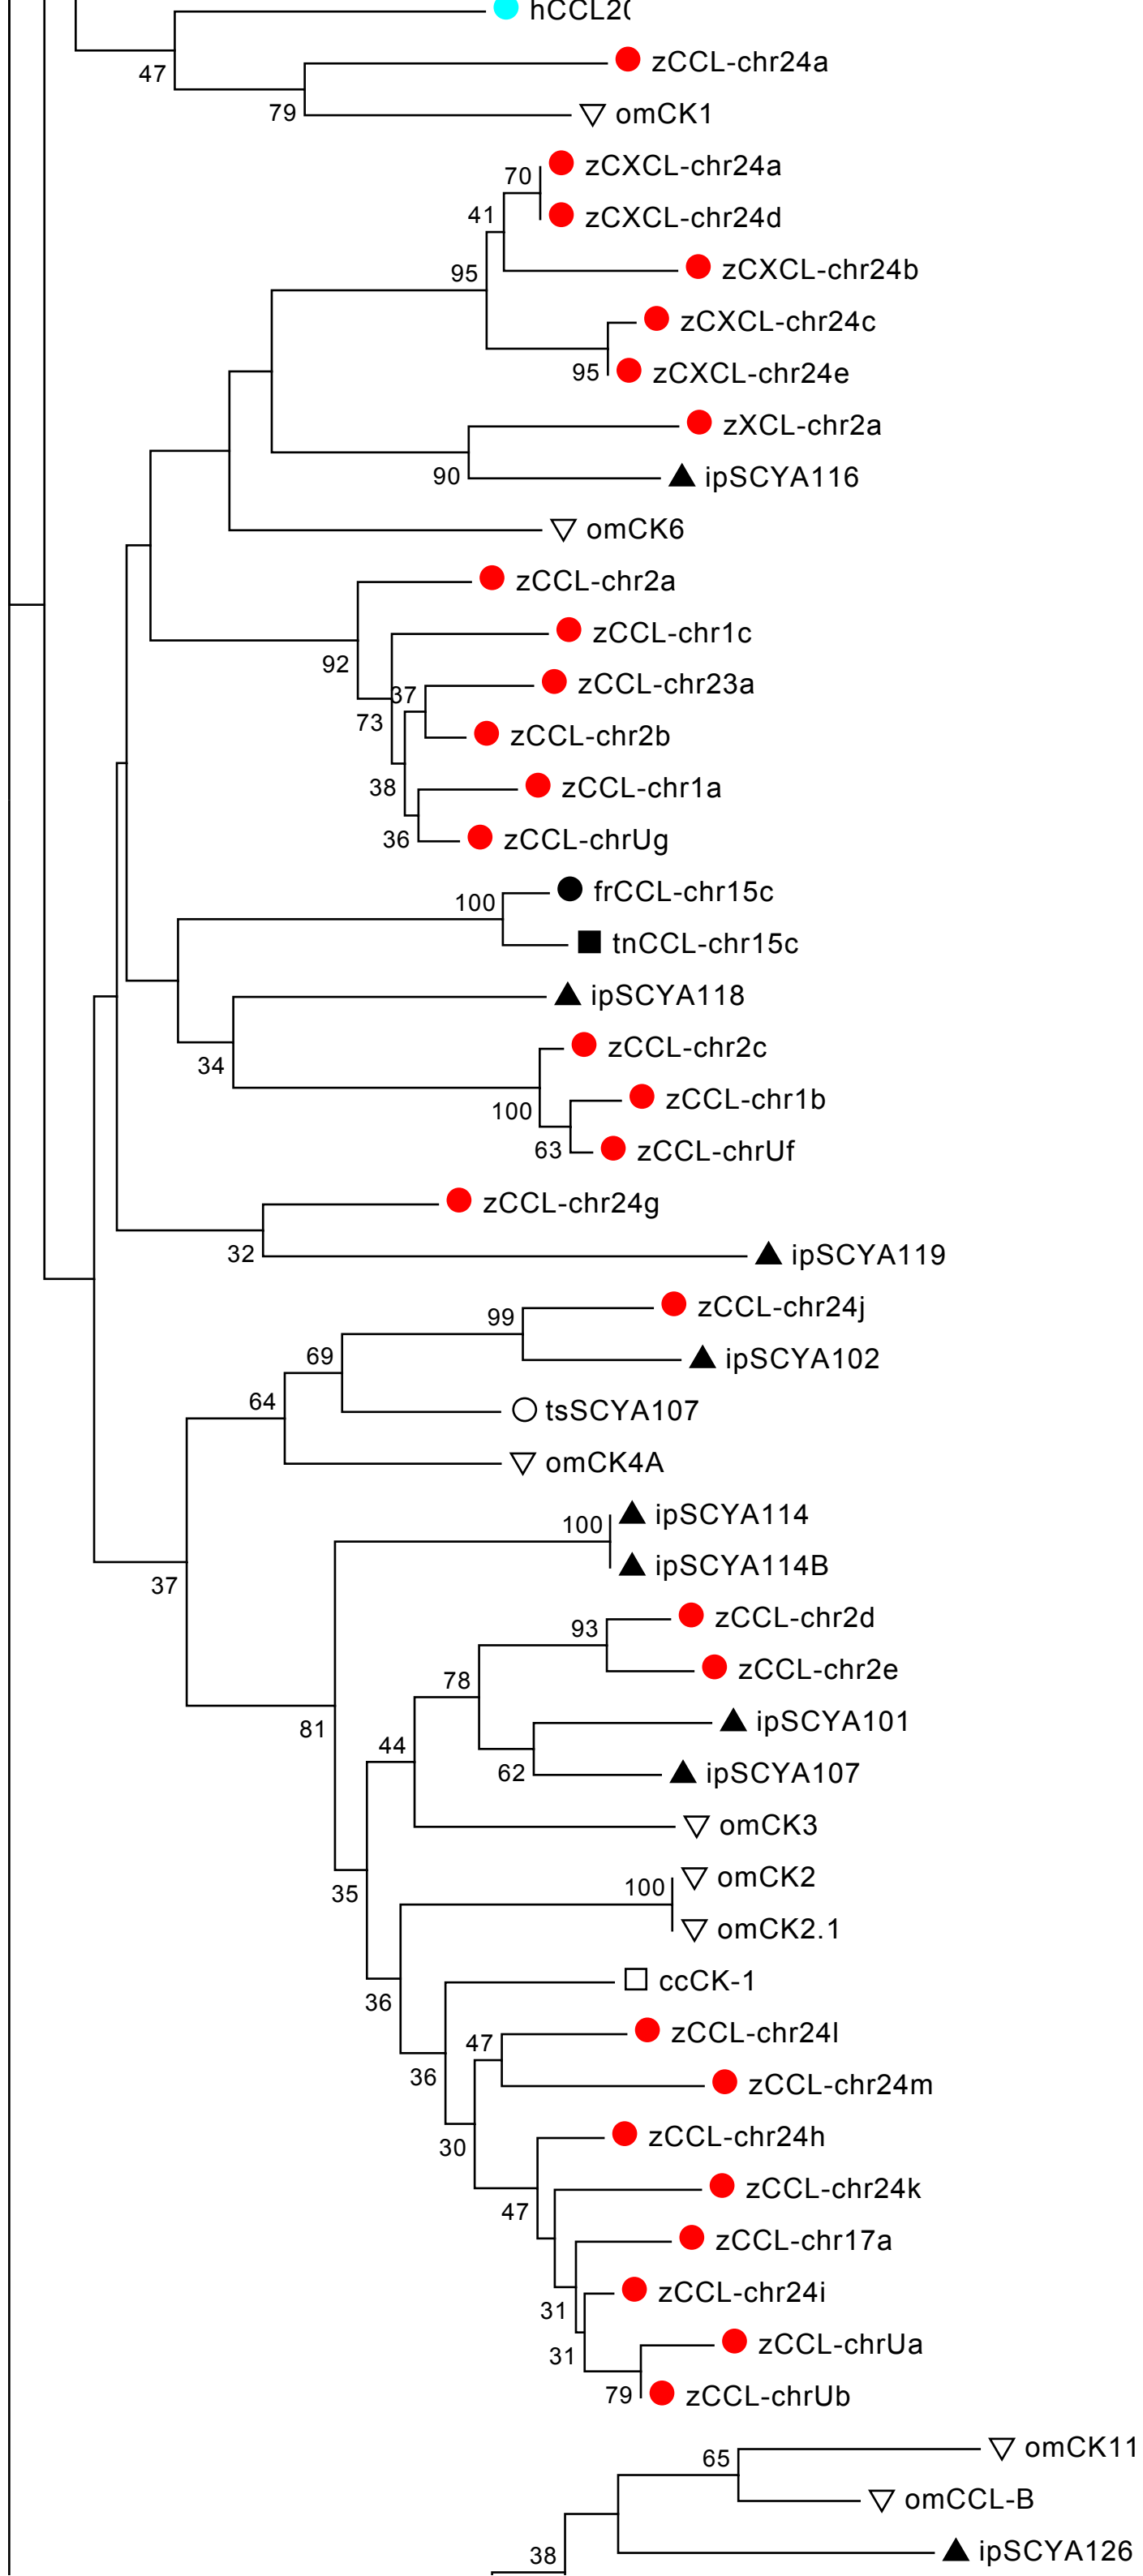

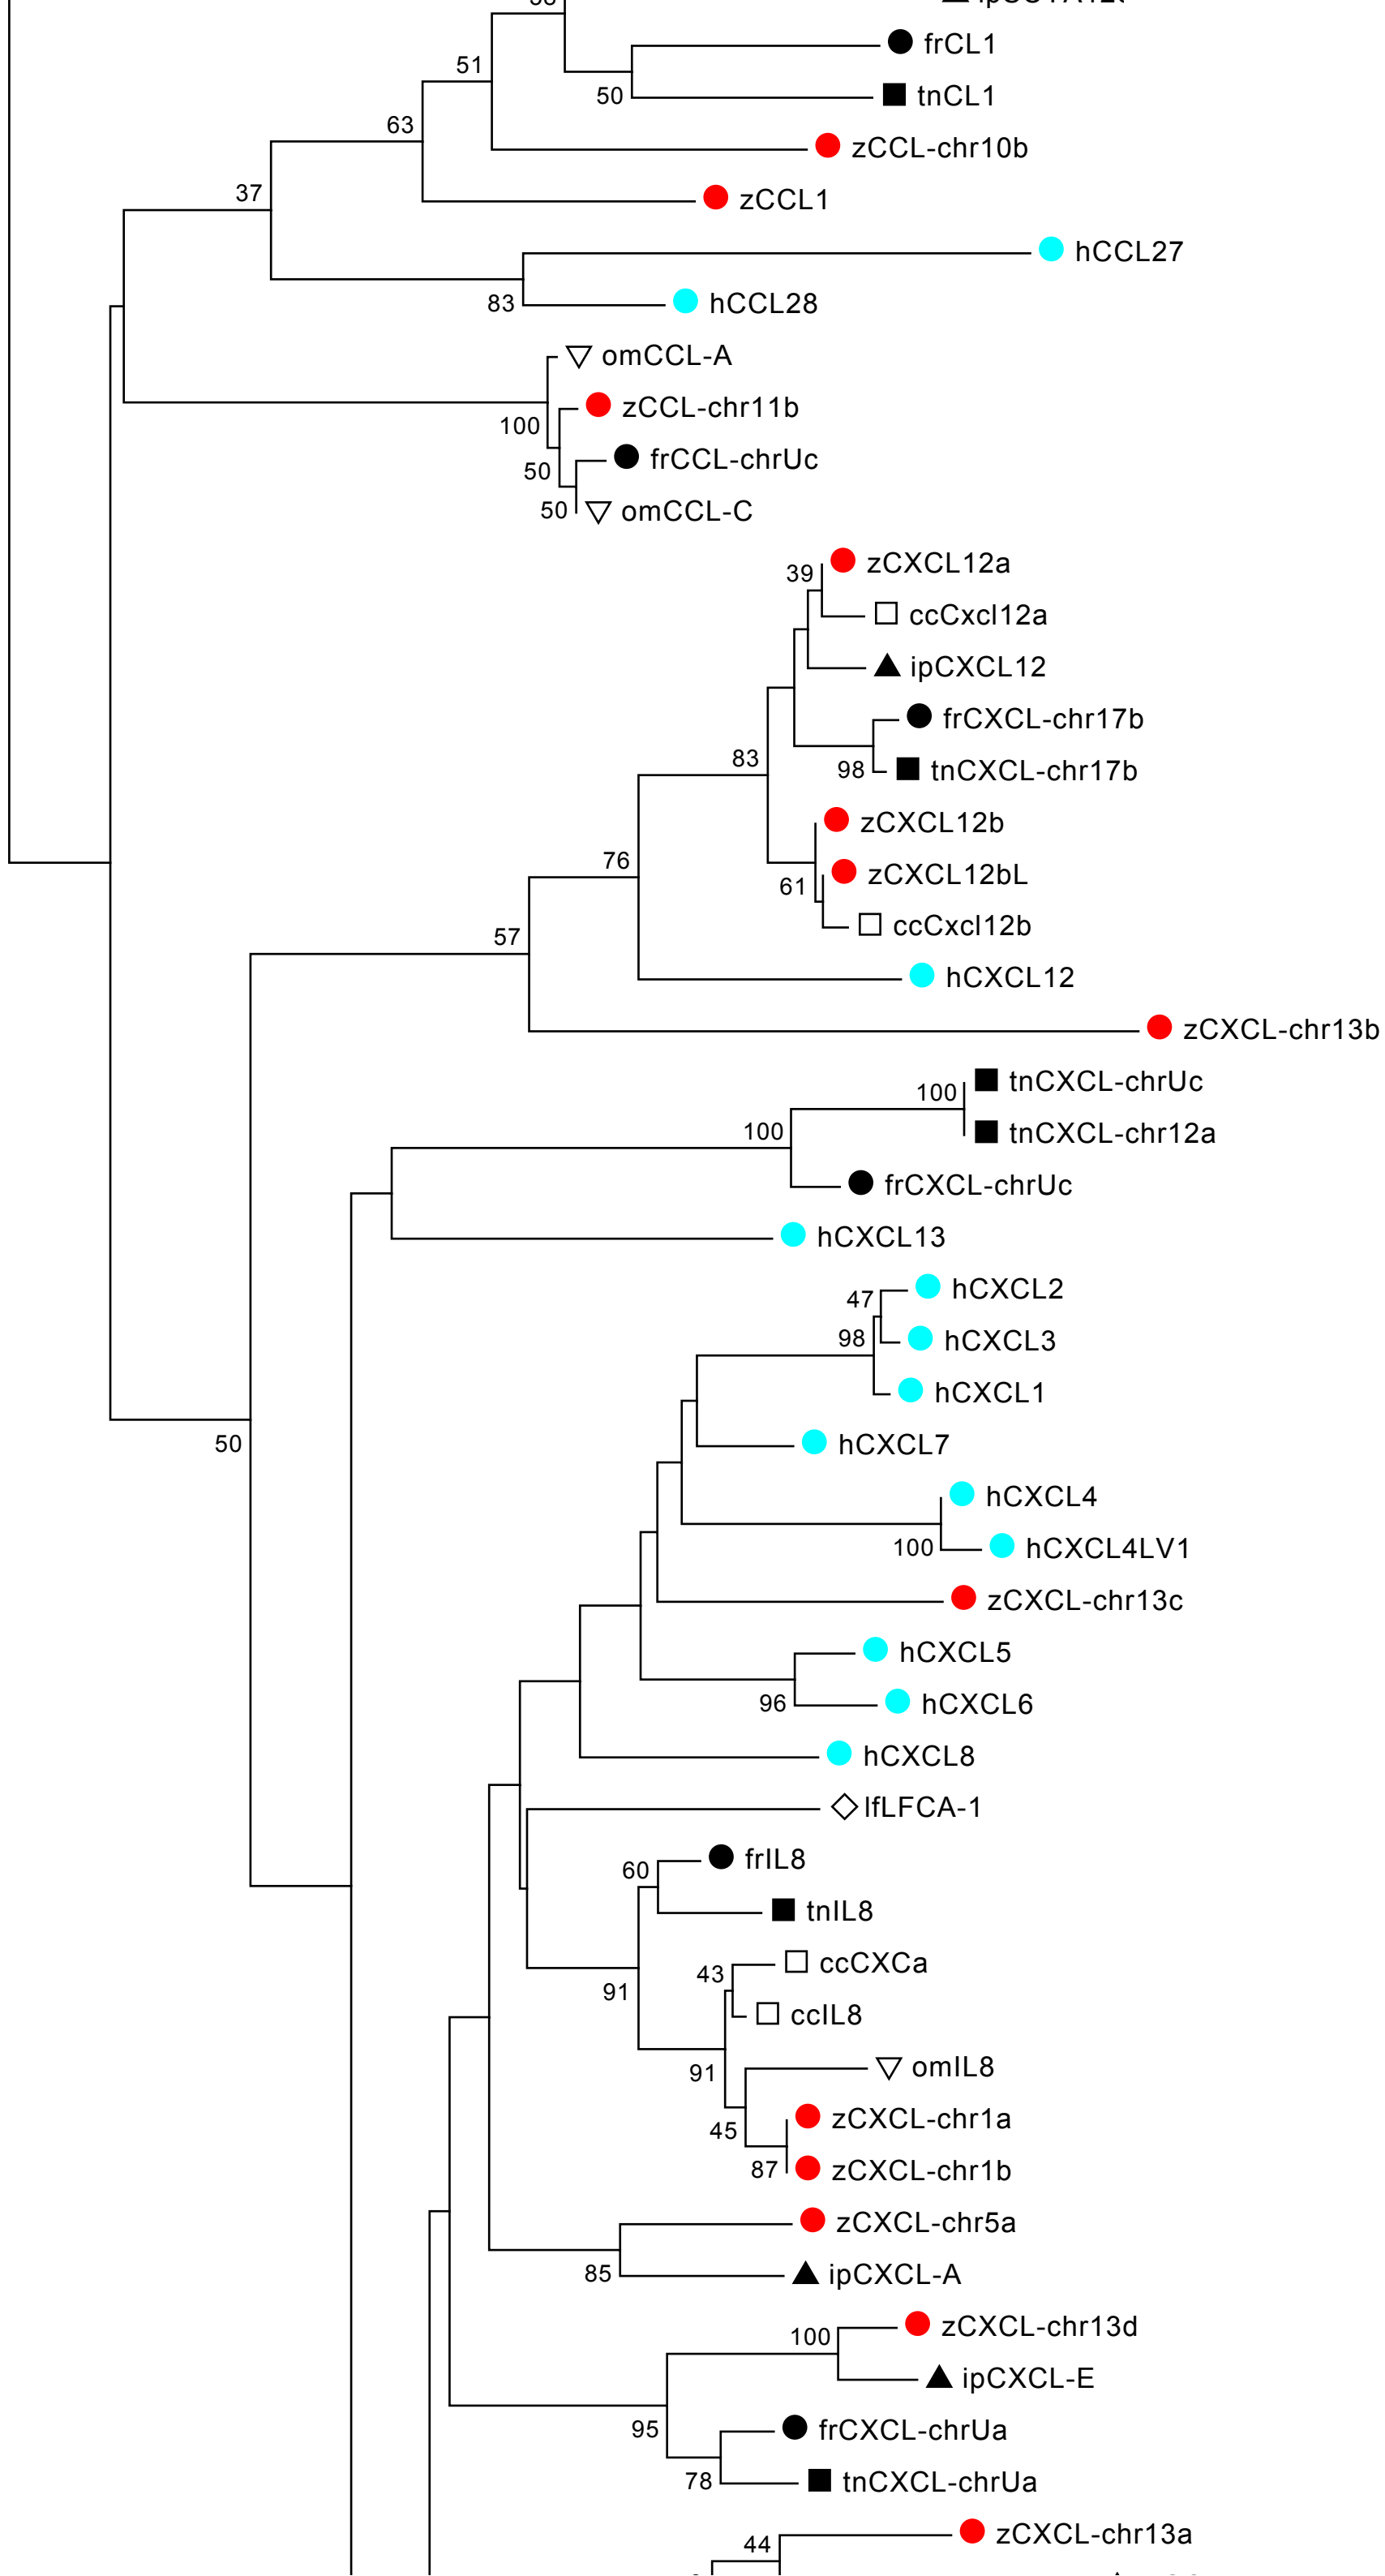

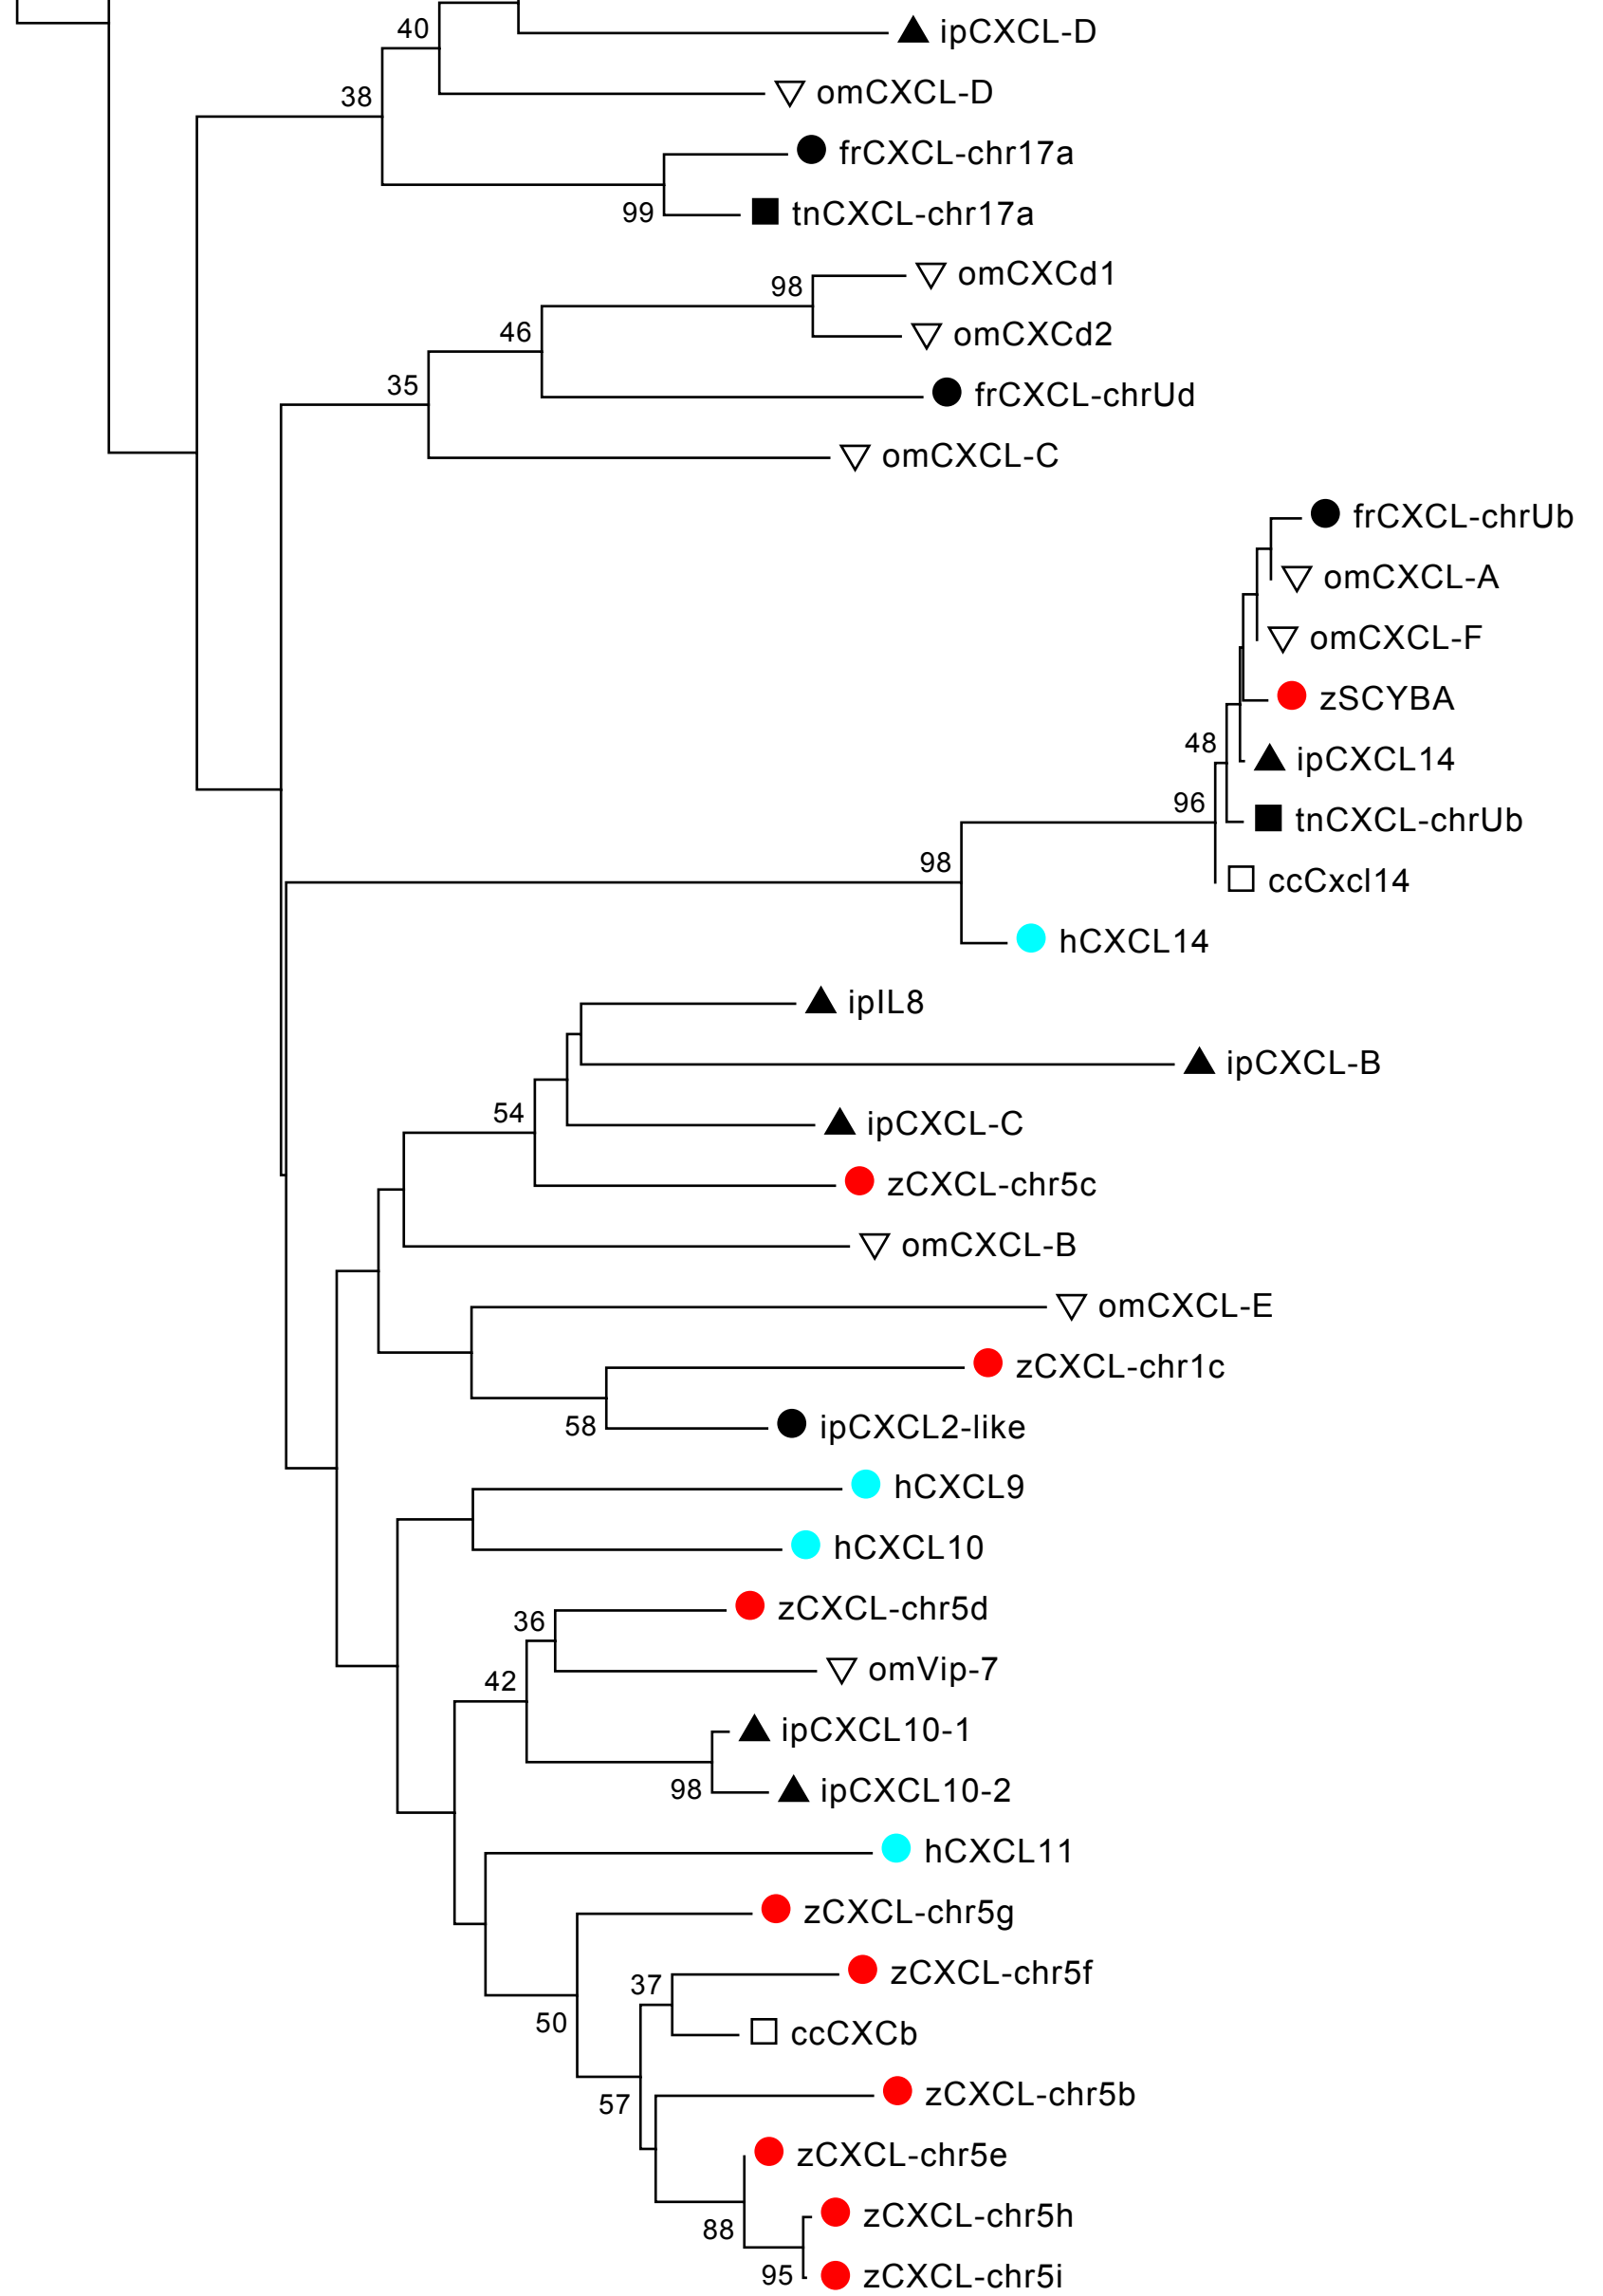

0.2
